# Supplementary material for: Selective synthesis of dimethyl carbonate from urea and methanol over Fe2O3/HMCM-49
Source: Royal Society of Chemistry journal article supplement (doi:10.1039/c1cy00216c), 2011-11-02
Supplement: c1cy00216c.pdf [file c1cy00216c.pdf]

## Supporting information

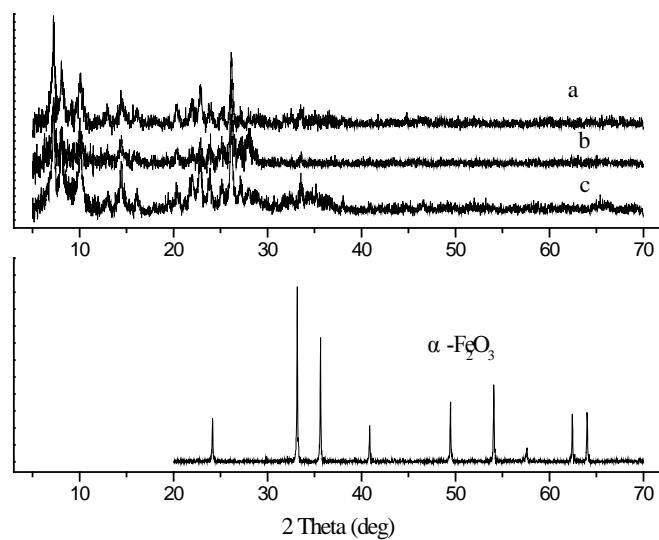

XRD patterns of Fe<sub>2</sub>O<sub>3</sub>/HMCM-49 with various supporting loadings  
a: 0.32%; b: 0.69%; c: 5.04%
